# Supplementary material
Source: publisher figshare collection journal article supplement (https://frontiersin.figshare.com/ndownloader/files/21663864)
Supplement: Supplementary file [file 21663864]

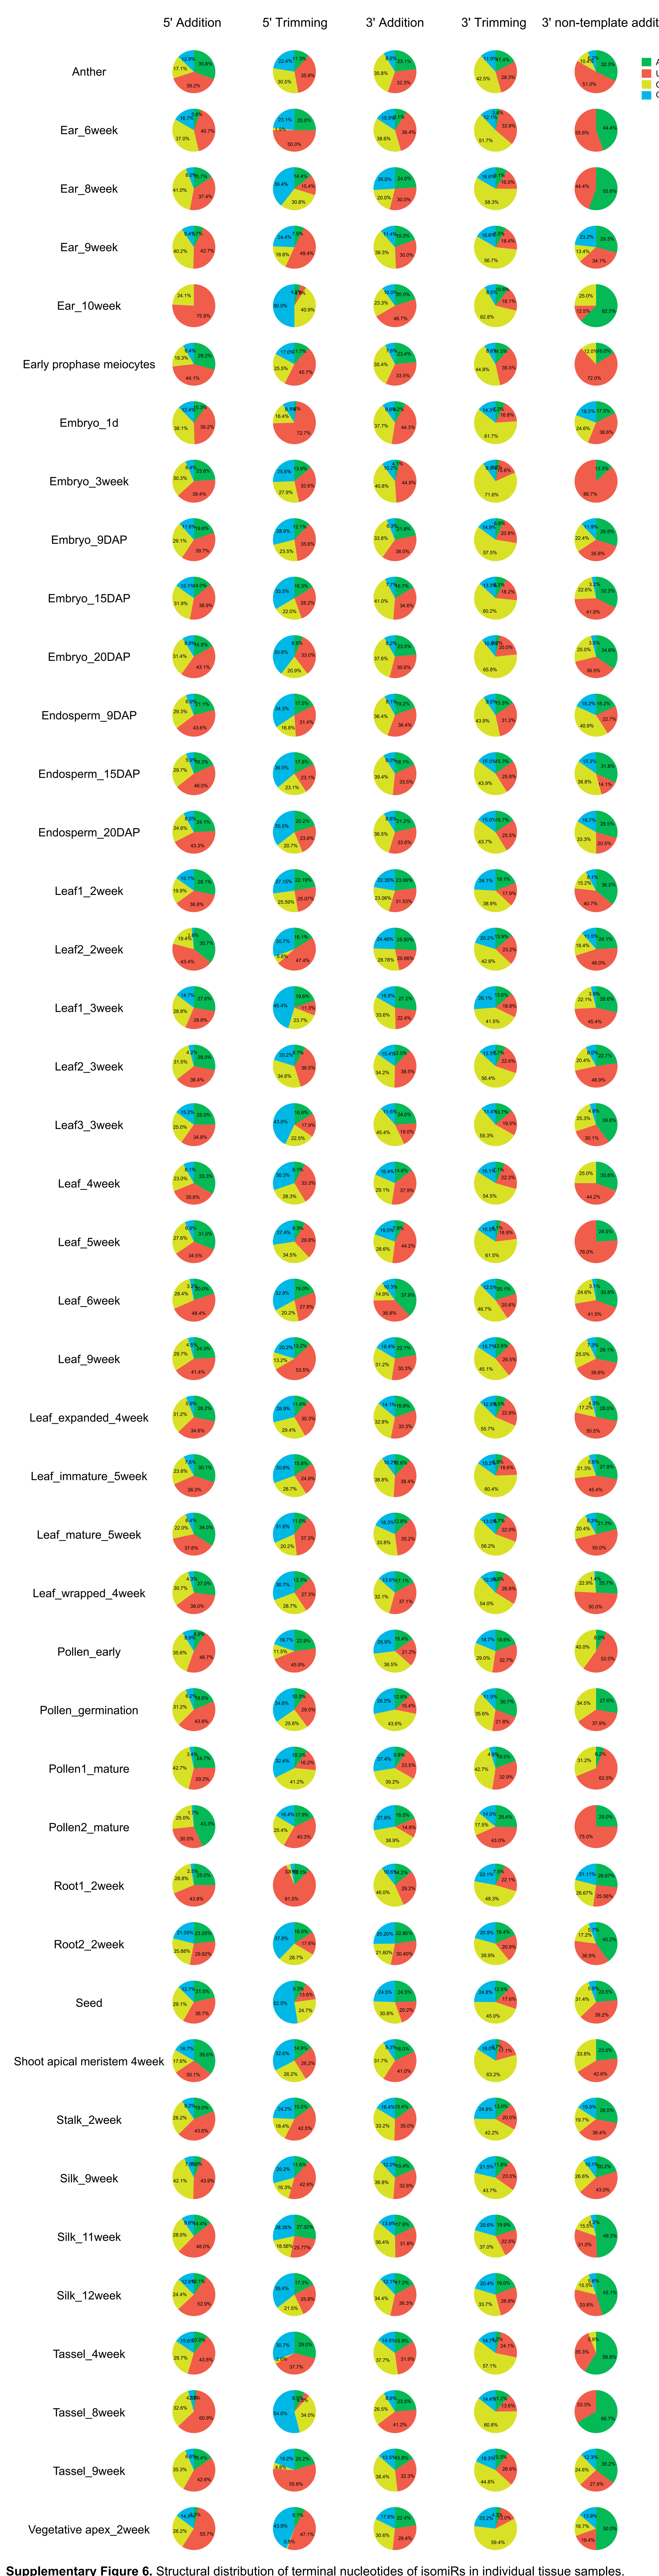

Supplementary Figure 6. Structural distribution of terminal nucleotides of isomiRs in individual tissue samples.
